# Supplementary material for: The Role of Preservation Solutions upon Saphenous Vein Endothelial Integrity and Function: Systematic Review and UK Practice Survey
Source: MDPI journal article supplement (doi:10.3390/cells12050815), 2023-03-06
Supplement: s1 [file s1]

**Supplementary Table S1.** Literature search strategy.

Ovid MEDLINE(R) ALL <1946 to August 09, 2022>

- 1 exp Coronary Artery Bypass/
  - 2 (Coronary Artery Bypass or CABG).mp.
  - 3 Saphenous Vein.mp.
  - 4 exp Saphenous Vein/
  - 5 (preservation solution or storage solution or saline solution or heparinised blood or buffered solution).mp.
  - 6 (AHB or GALA or HTK or UWS).mp.
  - 7 (University of Wisconsin or Histidine-tryptophan-ketoglutarate or TiProtec or He solution or Glutathione-ascorbic L-arginin).mp.
  - 8 1 or 2
  - 9 3 or 4
  - 10 5 or 6 or 7
  - 11 8 and 9 and 10
- Total = 46

Embase <1974 to 2022 August 09>

- 1 exp Coronary Artery Bypass/
  - 2 (Coronary Artery Bypass or CABG).mp.
  - 3 Saphenous Vein.mp.
  - 4 exp Saphenous Vein/
  - 5 (preservation solution or storage solution or saline solution or heparinised blood or buffered solution).mp.
  - 6 (AHB or GALA or HTK or UWS).mp.
  - 7 (University of Wisconsin or Histidine-tryptophan-ketoglutarate or TiProtec or He solution or Glutathione-ascorbic L-arginin).mp.
  - 8 1 or 2
  - 9 3 or 4
  - 10 5 or 6 or 7
  - 11 8 and 9 and 10
- Total = 75

Web Of Science through Clarivate (09/08/22)

((ALL=((Saphenous Vein) OR (GSV)))) AND ALL=((Coronary Artery Bypass OR CABG))) AND  
ALL=(preservation solution or storage solution or saline solution or heparinised blood or buffered solution or  
AHB or GALA or HTK or UWS or University of Wisconsin or Histidine-tryptophan-ketoglutarate or TiProtec or  
He solution or Glutathione-ascorbic L-arginin)

Total = **101**
